# Supplementary material
Source: PubMed Central journal article supplement (PMC5799042)
Supplement: NIHMS938523-supplement-Supplemental_Tutorial_Links.pdf [file NIHMS938523-supplement-Supplemental_Tutorial_Links.pdf]

## **Supplemental Table 1. Skyline tutorials by topic with links**

### **Targeted Method Editing**

[https://skyline.ms/wiki/home/software/Skyline/page.view?name=tutorial\\_method\\_edit](https://skyline.ms/wiki/home/software/Skyline/page.view?name=tutorial_method_edit)

### **Targeted Method Refinement**

[https://skyline.ms/wiki/home/software/Skyline/page.view?name=tutorial\\_method\\_refine](https://skyline.ms/wiki/home/software/Skyline/page.view?name=tutorial_method_refine)

### **Processing Grouped Study Data**

[https://skyline.ms/wiki/home/software/Skyline/page.view?name=tutorial\\_grouped](https://skyline.ms/wiki/home/software/Skyline/page.view?name=tutorial_grouped)

### **Existing and Quantitative Experiments**

[https://skyline.ms/wiki/home/software/Skyline/page.view?name=tutorial\\_existing\\_quant](https://skyline.ms/wiki/home/software/Skyline/page.view?name=tutorial_existing_quant)

### **Small Molecule Targets**

[https://skyline.ms/wiki/home/software/Skyline/page.view?name=tutorial\\_small\\_molecule](https://skyline.ms/wiki/home/software/Skyline/page.view?name=tutorial_small_molecule)

### **MS1 Full-Scan Filtering**

[https://skyline.ms/wiki/home/software/Skyline/page.view?name=tutorial\\_ms1\\_filtering](https://skyline.ms/wiki/home/software/Skyline/page.view?name=tutorial_ms1_filtering)

### **Targeted MS/MS (PRM)**

[https://skyline.ms/wiki/home/software/Skyline/page.view?name=tutorial\\_targeted\\_msms](https://skyline.ms/wiki/home/software/Skyline/page.view?name=tutorial_targeted_msms)

### **Data Independent Acquisition**

[https://skyline.ms/wiki/home/software/Skyline/page.view?name=tutorial\\_dia](https://skyline.ms/wiki/home/software/Skyline/page.view?name=tutorial_dia)

### **Absolute Quantification**

[https://skyline.ms/wiki/home/software/Skyline/page.view?name=tutorial\\_absolute\\_quant](https://skyline.ms/wiki/home/software/Skyline/page.view?name=tutorial_absolute_quant)

### **Custom and Live Reports**

[https://skyline.ms/wiki/home/software/Skyline/page.view?name=tutorial\\_custom\\_reports](https://skyline.ms/wiki/home/software/Skyline/page.view?name=tutorial_custom_reports)

### **Advanced Peak Picking Models**

[https://skyline.ms/wiki/home/software/Skyline/page.view?name=tutorial\\_peak\\_picking](https://skyline.ms/wiki/home/software/Skyline/page.view?name=tutorial_peak_picking)

### **iRT Retention Time Prediction**

[https://skyline.ms/wiki/home/software/Skyline/page.view?name=tutorial\\_irt](https://skyline.ms/wiki/home/software/Skyline/page.view?name=tutorial_irt)

### **Collision Energy Optimization**

[https://skyline.ms/wiki/home/software/Skyline/page.view?name=tutorial\\_optimize\\_ce](https://skyline.ms/wiki/home/software/Skyline/page.view?name=tutorial_optimize_ce)

### **Spectral Library Explorer**

[https://skyline.ms/wiki/home/software/Skyline/page.view?name=tutorial\\_library\\_explorer](https://skyline.ms/wiki/home/software/Skyline/page.view?name=tutorial_library_explorer)

### **QuaSAR Quantitative Statistics**

[https://skyline.ms/wiki/home/software/Skyline/page.view?name=tutorial\\_quasar](https://skyline.ms/wiki/home/software/Skyline/page.view?name=tutorial_quasar)
